# Supplementary material for: Lack of knowledge on ecological determinants and cryptic lifestyles hinder our understanding of Terfezia diversity
Source: MycoKeys. 2021 Oct 18;84:1–14. doi: 10.3897/mycokeys.84.71372 (PMC8545789; doi:10.3897/mycokeys.84.71372)
Supplement: Supplementary material 1 — Table S1 [file mycokeys-84-001-s001.xlsx]

## Sheet: info
Title:	Lack of knowledge on ecological determinants and cryptic lifestyles hinder our understanding of Terfezia diversity
Authors:	Celeste Santos-Silva1*, Rogério Louro1, Bruno Natário1 and Tânia Nobre2
	1 Biology Department, Macromycology Laboratory, MED - Mediterranean Institute for Agriculture, Environment and Development, University of Évora, Évora, Portugal
	2 MED—Mediterranean Institute for Agriculture, Environment and Development, University of Évora, 7000-083 Évora, Portugal
	*	Corresponding author: Celeste Santos-Silva (css@uevora.pt)
Data type:	Taxonomic, geographical and ecological information
Legend:	All Terfezia specimens from which the ITS sequences were obtained, their identification numbers, geographical location and ecological features (when information was not available "-" is used)
Explanation note:	This file discloses all Terfezia sequences falling within each clade on the phylogenetic analysis generated in this work (including the 45 sequences selected from the most recent genus phylogenetic reconstruction and the 216 newly generated sequences from this work) and their respective accession numbers and bibliographic references. A collection/sampling number is also provided for each one of t…
	Geographic data such as country of origin and locality is also provided here for every sequence in the dataset. Also, geospatial coordinates (longitude, latitude) were added for the 216 newly generated sequences from this work. Given the extent of the sampling area, each geospatial coordinates refers to the central point of the capital district city nearest to the collection site.
	Finally, ecological parameters, specifically, putative host plant, soil type, soil pH and soil granulometry are here specified for each one of the sequence in analysis whenever the information was available.

## Sheet: Species, ecology and location
Terfezia species	Accession Nº	Sample nº	Reference	Collection Site	Longitude	Latitude	Host plant	Soil type	pH	granulometry
T. albida	HM056220	-	Bordallo et al. 2013	Spain:Albacete	-	-	Helianthemum sp.	Alkaline	-	-
	HQ698146	-	Kovacs et al. 2011	Spain:Salamanca	-	-	Tuberaria guttata	-	-	-
T. alsheikhii	HM056207	-	Bordallo et al. 2013	Portugal:Trás-os-Montes	-	-	Cistaceae	Acid	-	-
	HM056208	-	Bordallo et al. 2013	Spain:Badajoz	-	-	-	-	-	-
T. arenaria	HQ698066	-	Kovacs et al. 2011	Spain: Badajoz	-	-	Cistaceae	Acid	-	-
	KP217815	-	Dafri and Beddiar 2017	Algeria	-	-	Tuberaria guttata	-	-	-
	MW508719	254	Unpub.	Portugal: Évora	38°34'00"N	7°54'00"W	Tuberaria guttata	Acid	7.2	loamy sand
	MW508721	255	Unpub.	Portugal: Évora	38°34'00"N	7°54'00"W	Tuberaria guttata	Acid	7.2	loamy sand
	MW508720	404	Unpub.	Portugal: Leiria	39°44'58"N	8°48'28"W	Tuberaria guttata	Acid	7.3	loamy sand
	MW508664	1	Unpub.	Portugal: Portalegre	39°17'38"N	7°25'52"W	Tuberaria guttata	Acid	5.4	loamy sand
	MW508716	224	Unpub.	Portugal: Évora	38°34'00"N	7°54'00"W	Tuberaria guttata	Acid	6.2	sandy loam
	MW508705	268	Unpub.	Portugal: Setúbal	38°31'27"N	8°53'17"W	Tuberaria guttata	Acid	5.2	loamy sand
	MW508703	234	Unpub.	Portugal: Évora	38°34'00"N	7°54'00"W	Tuberaria guttata	Acid	5.5	sandy loam
	MW508712	349	Unpub.	Portugal: Évora	38°34'00"N	7°54'00"W	Tuberaria guttata	Acid	5.7	sandy loam
	MW508722	229	Unpub.	Portugal: Évora	38°34'00"N	7°54'00"W	Tuberaria guttata	Acid	5.6	loamy sand
	MW508702	232	Unpub.	Portugal: Évora	38°34'00"N	7°54'00"W	Tuberaria guttata	Acid	5.5	loamy sand
	MW508667	39	Unpub.	Portugal: Setúbal	38°31'27"N	8°53'17"W	Tuberaria guttata	Acid	5.2	loamy sand
	MW508674	5	Unpub.	Portugal: Évora	38°34'00"N	7°54'00"W	Tuberaria guttata	Acid	5.5	sandy loam
	MW508676	10	Unpub.	Portugal: Évora	38°34'00"N	7°54'00"W	Tuberaria guttata	Acid	5.3	loamy sand
	MW508690	395	Unpub.	Portugal: Portalegre	39°17'38"N	7°25'52"W	Tuberaria guttata	Acid	5.7	loamy sand
	MW508669	23	Unpub.	Portugal: Portalegre	39°17'38"N	7°25'52"W	Tuberaria guttata	Acid	5.7	loamy sand
	MW508686	398	Unpub.	Portugal: Portalegre	39°17'38"N	7°25'52"W	Tuberaria guttata	Acid	5.7	loamy sand
	MW508717	220	Unpub.	Portugal: Évora	38°34'00"N	7°54'00"W	Tuberaria guttata	Acid	6.0	sandy loam
	MW508689	399	Unpub.	Portugal: Portalegre	39°17'38"N	7°25'52"W	Tuberaria guttata	Acid	5.7	loamy sand
	MW508707	26	Unpub.	Portugal: Portalegre	39°17'38"N	7°25'52"W	Tuberaria guttata	Acid	5.8	loamy sand
	MW508715	202	Unpub.	Portugal: Évora	38°34'00"N	7°54'00"W	Tuberaria guttata	Acid	6.2	sandy loam
	MW508718	217	Unpub.	Portugal: Évora	38°34'00"N	7°54'00"W	Tuberaria guttata	Acid	6.0	loamy sand
	MW508675	396	Unpub.	Portugal: Portalegre	39°17'38"N	7°25'52"W	Tuberaria guttata	Acid	5.7	loamy sand
	MW508685	8	Unpub.	Portugal: Setúbal	38°31'27"N	8°53'17"W	Tuberaria guttata	Acid	5.2	loamy sand
	MW508687	397	Unpub.	Portugal: Portalegre	39°17'38"N	7°25'52"W	Tuberaria guttata	Acid	5.7	loamy sand
	MW508684	7	Unpub.	Portugal: Évora	38°34'00"N	7°54'00"W	Tuberaria guttata	Acid	5.2	loamy sand
	MW508704	239	Unpub.	Portugal: Évora	38°34'00"N	7°54'00"W	Tuberaria guttata	Acid	5.5	loamy sand
	MW508711	303	Unpub.	Portugal: Évora	38°34'00"N	7°54'00"W	Tuberaria guttata	Acid	6.2	sandy loam
	MW508693	24	Unpub.	Portugal: Portalegre	39°17'38"N	7°25'52"W	Tuberaria guttata	Acid	5.6	loamy sand
	MW508681	29	Unpub.	Portugal: Castelo Branco	39°57'23''N	7°31'23''W	Tuberaria guttata	Acid	5.2	loamy sand
	MW508714	348	Unpub.	Portugal: Évora	38°34'00"N	7°54'00"W	Tuberaria guttata	Acid	5.8	sandy loam
	MW508673	2	Unpub.	Portugal: Portalegre	39°17'38"N	7°25'52"W	Tuberaria guttata	Acid	5.6	sandy loam
	MW508692	55	Unpub.	Portugal: Évora	38°34'00"N	7°54'00"W	Tuberaria guttata	Acid	5.3	sandy loam
	MW508683	56	Unpub.	Portugal: Setúbal	38°31'27"N	8°53'17"W	Tuberaria guttata	Acid	6.1	loamy sand
	MW508672	6	Unpub.	Portugal: Évora	38°34'00"N	7°54'00"W	Tuberaria guttata	Acid	5.5	sandy loam
	MW508708	66	Unpub.	Portugal: Portalegre	39°17'38"N	7°25'52"W	Tuberaria guttata	Acid	5.6	loamy sand
	MW508677	378	Unpub.	Portugal: Évora	38°34'00"N	7°54'00"W	Tuberaria guttata	Acid	5.7	sandy loam
	MW508691	20	Unpub.	Portugal: Portalegre	39°17'38"N	7°25'52"W	Tuberaria guttata	Acid	5.6	loamy sand
	MW508678	30	Unpub.	Portugal: Castelo Branco	39°57'23''N	7°31'23''W	Tuberaria guttata	Acid	5.1	loamy sand
	MW508688	51	Unpub.	Portugal: Évora	38°34'00"N	7°54'00"W	Tuberaria guttata	Acid	5.5	loamy sand
	MW508670	25	Unpub.	Portugal: Portalegre	39°17'38"N	7°25'52"W	Tuberaria guttata	Acid	5.7	loamy sand
	MW508671	105	Unpub.	Portugal: Castelo Branco	39°57'23''N	7°31'23''W	Tuberaria guttata	Acid	5.1	loamy sand
	MW508696	12	Unpub.	Portugal: Évora	38°34'00"N	7°54'00"W	Tuberaria guttata	Acid	5.5	loamy sand
	MW508713	368	Unpub.	Portugal: Évora	38°34'00"N	7°54'00"W	Tuberaria guttata	Acid	6.0	sandy loam
	MW508710	287	Unpub.	Portugal: Évora	38°34'00"N	7°54'00"W	Tuberaria guttata	Acid	5.7	sandy loam
	MW508700	384	Unpub.	Portugal: Évora	38°34'00"N	7°54'00"W	Tuberaria guttata	Acid	5.7	sandy loam
	MW508699	264	Unpub.	Portugal: Évora	38°34'00"N	7°54'00"W	Tuberaria guttata	Acid	6.2	loamy sand
	MW508698	249	Unpub.	Portugal: Portalegre	39°17'38"N	7°25'52"W	Tuberaria guttata	Acid	5.7	loamy sand
	MW508701	121	Unpub.	Portugal: Évora	38°34'00"N	7°54'00"W	Tuberaria guttata	Acid	6.0	sandy loam
	MW508706	240	Unpub.	Portugal: Évora	38°34'00"N	7°54'00"W	Tuberaria guttata	Acid	5.3	sandy loam
	MW508697	247	Unpub.	Portugal: Portalegre	39°17'38"N	7°25'52"W	Tuberaria guttata	Acid	5.6	loamy sand
	MW508666	17	Unpub.	Portugal: Évora	38°34'00"N	7°54'00"W	Tuberaria guttata	Acid	5.2	loamy sand
	MW508694	102	Unpub.	Portugal: Portalegre	39°17'38"N	7°25'52"W	Tuberaria guttata	Acid	5.6	loamy sand
	MW508695	116	Unpub.	Portugal: Castelo Branco	39°57'23''N	7°31'23''W	Tuberaria guttata	Acid	5.1	loamy sand
	MW508668	84	Unpub.	Portugal: Setúbal	38°31'27"N	8°53'17"W	Tuberaria guttata	Acid	6.1	loamy sand
	MW508679	9	Unpub.	Portugal: Évora	38°34'00"N	7°54'00"W	Tuberaria guttata	Acid	5.5	sandy loam
	MW508709	282	Unpub.	Portugal: Évora	38°34'00"N	7°54'00"W	Tuberaria guttata	Acid	5.8	sandy loam
	MW508665	3	Unpub.	Portugal: Évora	38°34'00"N	7°54'00"W	Tuberaria guttata	Acid	6.0	sandy loam
	MW508682	42	Unpub.	Portugal: Setúbal	38°31'27"N	8°53'17"W	Tuberaria guttata	Acid	5.2	loamy sand
	MW508680	83	Unpub.	Portugal: Setúbal	38°31'27"N	8°53'17"W	Tuberaria guttata	Acid	6.1	loamy sand
T. boudieri	AF092096	-	Ferdman et al. 2005	Israel:Negev	-	-	-	-	-	-
	GU474808	-	Sbissi et al. 2011	Tunisia	-	-	Helianthemum sp.	-	-	-
T. canariensis	JQ858196	-	Bordallo et al. 2012	Spain:Canary Island	-	-	Helianthemum canariense	Alkaline	-	-
T. cistophila	KP728823	-	Bordallo et al. 2015	Spain:Caceres	-	-	Cistus ladanifer	Acid	-	-
	KP728828	-	Bordallo et al. 2015	Greece:Nea Makri Attica	-	-	Cistus monspeliensis, C. creticus	Acid	-	-
	MN338749	-	Louro et al. 2020	Portugal: Évora	38°34'00"N	7°54'00"W	Cistus salviifolius	Acid	5.6	loamy sand
	MW508652	375	Unpub.	Portugal: Évora	38°34'00"N	7°54'00"W	Cistus salviifolius	Acid	5.5	loamy sand
	MW508653	389	Unpub.	Portugal: Portalegre	39°17'38"N	7°25'52"W	Cistus ladanifer	Acid	5.6	loamy sand
T. claveryi	HM352540	-	Jamali and Banihashemi 2012	Iran	-		Helianthemum sp., Carex sp.	Alkaline	-	-
	HQ698080	-	Kovacs et al. 2011	Spain:Granada	-		Helianthemum salicifolium	-	-	-
T. crassiverrucosa	AF387646	-	Kovacs et al. 2011	Spain	-	-	-	-	-	-
	AF387647	-	Kovacs et al. 2011	Spain:Murcia	-	-	-	-	-	-
	AF396864	-	Diez et al. 2002	Spain:Valencia	-	-	Pinus halepensis	Acid	-	-
T. dunensis	MN438324	-	Crous et al. 2019	Spain: Huelva	-	-	Cistus salviifolius, Halimium halimifolium	Acid	-	-
	MN438325	-	Crous et al. 2019	Spain: Huelva	-	-	Cistus salviifolius, Halimium halimifolium	Acid	-	-
	MW508654	374	Unpub.	Portugal: Faro	37°01'10"N	7°55'56"W	Pinus pinea, Cistus salviifolius	Acid	6.1	sandy
T. eliocrocae	HM056205	-	Bordallo et al. 2013	Spain: Murcia	-	-	Helianthemum sp.	Alkaline	-	-
	HM056206	-	Bordallo et al. 2013	Spain: Murcia	-	-	Helianthemum sp.	Alkaline	-	-
T. extremadurensis	HM056202	-	Bordallo et al. 2013	Spain:Caceres	-	-	Tuberaria guttata	-	-	-
	HQ698134	-	Kovacs et al. 2011	Spain:Jaen	-	-	Cistus albidus	-	-	-
	MW508662	134	Unpub.	Portugal: Portalegre	39°17'38"N	7°25'52"W	Tuberaria guttata	Acid	5.4	sandy loam
	MW508661	271	Unpub.	Portugal: Portalegre	39°17'38"N	7°25'52"W	Tuberaria guttata	Acid	5.4	sandy loam
	MW508659	272	Unpub.	Portugal: Portalegre	39°17'38"N	7°25'52"W	Tuberaria guttata	Acid	5.4	sandy loam
	MW508658	273	Unpub.	Portugal: Portalegre	39°17'38"N	7°25'52"W	Tuberaria guttata	Acid	5.4	sandy loam
	MW508660	274	Unpub.	Portugal: Portalegre	39°17'38"N	7°25'52"W	Tuberaria guttata	Acid	5.4	sandy loam
	MW508663	165	Unpub.	Portugal: Portalegre	39°17'38"N	7°25'52"W	Tuberaria guttata	Acid	5.5	sandy loam
	MW508655	31	Unpub.	Portugal: Castelo Branco	39°57'23''N	7°31'23''W	Tuberaria guttata	Acid	5.3	sandy loam
	MW508656	50	Unpub.	Portugal: Santarém	39°13'60"N	8°40'60"W	Tuberaria guttata	Acid	5.5	sandy loam
	MW508657	289	Unpub.	Portugal: Évora	38°34'00"N	7°54'00"W	Tuberaria guttata	Acid	6.0	sandy loam
T. fanfani	HM056219	-	Bordallo et al. 2013	Spain:Badajoz	-	-	Tuberaria guttata	Acid	-	-
	HQ698088	-	Kovacs et al. 2011	Spain:Caceres	-	-	-	-	-	-
	MN338740	-	Louro et al. 2020	Portugal: Évora	38°34'00"N	7°54'00"W	Tuberaria guttata	Acid	6.2	sandy loam
	MN338738	-	Louro et al. 2020	Portugal: Évora	38°34'00"N	7°54'00"W	Tuberaria guttata	Acid	5.6	loamy sand
	MN338742	-	Louro et al. 2020	Portugal: Portalegre	39°17'38"N	7°25'52"W	Tuberaria guttata	Acid	5.7	loamy sand
	MN338734	-	Louro et al. 2020	Portugal: Évora	38°34'00"N	7°54'00"W	Tuberaria guttata	Acid	6.0	sandy loam
	MN338741	-	Louro et al. 2020	Portugal: Évora	38°34'00"N	7°54'00"W	Tuberaria guttata	Acid	6.2	sandy loam
	MN338735	-	Louro et al. 2020	Portugal: Évora	38°34'00"N	7°54'00"W	Tuberaria guttata	Acid	6.2	sandy loam
	MN338736	-	Louro et al. 2020	Portugal: Évora	38°34'00"N	7°54'00"W	Tuberaria guttata	Acid	6.2	sandy loam
	MN338737	-	Louro et al. 2020	Portugal: Évora	38°34'00"N	7°54'00"W	Tuberaria guttata	Acid	6.0	sandy loam
	MN338739	-	Louro et al. 2020	Portugal: Évora	38°34'00"N	7°54'00"W	Tuberaria guttata	Acid	6.0	sandy loam
	MN338743	-	Louro et al. 2020	Portugal: Setúbal	38°31'27"N	8°53'17"W	Tuberaria guttata	Acid	5.2	loamy sand
	MW508557	27	Unpub.	Portugal: Portalegre	39°17'38"N	7°25'52"W	Tuberaria guttata	Acid	5.4	sandy loam
	MW508597	379	Unpub.	Portugal: Évora	38°34'00"N	7°54'00"W	Tuberaria guttata	Acid	5.6	loamy sand
	MW508598	60	Unpub.	Portugal: Évora	38°34'00"N	7°54'00"W	Tuberaria guttata	Acid	5.4	loamy sand
	MW508585	383	Unpub.	Portugal: Évora	38°34'00"N	7°54'00"W	Tuberaria guttata	Acid	5.6	loamy sand
	MW508556	16	Unpub.	Portugal: Évora	38°34'00"N	7°54'00"W	Tuberaria guttata	Acid	5.4	loamy sand
	MW508625	214	Unpub.	Portugal: Évora	38°34'00"N	7°54'00"W	Tuberaria guttata	Acid	6.2	sandy loam
	MW508580	347	Unpub.	Portugal: Évora	38°34'00"N	7°54'00"W	Tuberaria guttata	Acid	5.6	loamy sand
	MW508616	222	Unpub.	Portugal: Évora	38°34'00"N	7°54'00"W	Tuberaria guttata	Acid	6.0	sandy loam
	MW508614	135	Unpub.	Portugal: Évora	38°34'00"N	7°54'00"W	Tuberaria guttata	Acid	6.4	sandy loam
	MW508612	92	Unpub.	Portugal: Portalegre	39°17'38"N	7°25'52"W	Tuberaria guttata	Acid	5.7	loamy sand
	MW508607	94	Unpub.	Portugal: Portalegre	39°17'38"N	7°25'52"W	Tuberaria guttata	Acid	5.7	loamy sand
	MW508570	365	Unpub.	Portugal: Évora	38°34'00"N	7°54'00"W	Tuberaria guttata	Acid	6.4	sandy loam
	MW508626	215	Unpub.	Portugal: Évora	38°34'00"N	7°54'00"W	Tuberaria guttata	Acid	6.2	sandy loam
	MW508596	288	Unpub.	Portugal: Évora	38°34'00"N	7°54'00"W	Tuberaria guttata	Acid	5.4	sandy loam
	MW508624	136	Unpub.	Portugal: Évora	38°34'00"N	7°54'00"W	Tuberaria guttata	Acid	6.4	sandy loam
	MW508604	120	Unpub.	Portugal: Évora	38°34'00"N	7°54'00"W	Tuberaria guttata	Acid	5.5	loamy sand
	MW508601	393	Unpub.	Portugal: Portalegre	39°17'38"N	7°25'52"W	Tuberaria guttata	Acid	5.7	loamy sand
	MW508586	19	Unpub.	Portugal: Portalegre	39°17'38"N	7°25'52"W	Tuberaria guttata	Acid	5.7	loamy sand
	MW508577	38	Unpub.	Portugal: Portalegre	39°17'38"N	7°25'52"W	Tuberaria guttata	Acid	5.6	loamy sand
	MW508592	33	Unpub.	Portugal: Beja	38°00'54''N	7°51'47''W	Tuberaria guttata	Acid	6.4	sandy loam
	MW508603	93	Unpub.	Portugal: Portalegre	39°17'38"N	7°25'52"W	Tuberaria guttata	Acid	5.7	loamy sand
	MW508572	376	Unpub.	Portugal: Évora	38°34'00"N	7°54'00"W	Tuberaria guttata	Acid	5.6	loamy sand
	MW508575	364	Unpub.	Portugal: Évora	38°34'00"N	7°54'00"W	Tuberaria guttata	Acid	6.4	sandy loam
	MW508628	235	Unpub.	Portugal: Évora	38°34'00"N	7°54'00"W	Tuberaria guttata	Acid	5.6	loamy sand
	MW508589	22	Unpub.	Portugal: Portalegre	39°17'38"N	7°25'52"W	Tuberaria guttata	Acid	5.7	loamy sand
	MW508565	394	Unpub.	Portugal: Portalegre	39°17'38"N	7°25'52"W	Tuberaria guttata	Acid	5.6	loamy sand
	MW508590	119	Unpub.	Portugal: Évora	38°34'00"N	7°54'00"W	Tuberaria guttata	Acid	5.5	loamy sand
	MW508619	152	Unpub.	Portugal: Évora	38°34'00"N	7°54'00"W	Tuberaria guttata	Acid	6.0	sandy loam
	MW508595	382	Unpub.	Portugal: Évora	38°34'00"N	7°54'00"W	Tuberaria guttata	Acid	5.6	loamy sand
	MW508630	197	Unpub.	Portugal: Évora	38°34'00"N	7°54'00"W	Tuberaria guttata	Acid	6.4	sandy loam
	MW508599	106	Unpub.	Portugal: Castelo Branco	39°57'23''N	7°31'23''W	Tuberaria guttata	Acid	5.1	loamy sand
	MW508563	377	Unpub.	Portugal: Évora	38°34'00"N	7°54'00"W	Tuberaria guttata	Acid	5.6	loamy sand
	MW508610	109	Unpub.	Portugal: Castelo Branco	39°57'23''N	7°31'23''W	Tuberaria guttata	Acid	5.1	loamy sand
	MW508623	211	Unpub.	Portugal: Évora	38°34'00"N	7°54'00"W	Tuberaria guttata	Acid	6.2	sandy loam
	MW508600	388	Unpub.	Portugal: Évora	38°34'00"N	7°54'00"W	Tuberaria guttata	Acid	6.0	sandy loam
	MW508609	309	Unpub.	Portugal: Évora	38°34'00"N	7°54'00"W	Tuberaria guttata	Acid	6.2	sandy loam
	MW508621	177	Unpub.	Portugal: Évora	38°34'00"N	7°54'00"W	Tuberaria guttata	Acid	5.5	loamy sand
	MW508611	95	Unpub.	Portugal: Évora	38°34'00"N	7°54'00"W	Tuberaria guttata	Acid	5.4	loamy sand
	MW508617	208	Unpub.	Portugal: Évora	38°34'00"N	7°54'00"W	Tuberaria guttata	Acid	6.2	sandy loam
	MW508573	401	Unpub.	Portugal: Portalegre	39°17'38"N	7°25'52"W	Tuberaria guttata	Acid	5.6	loamy sand
	MW508581	381	Unpub.	Portugal: Évora	38°34'00"N	7°54'00"W	Tuberaria guttata	Acid	5.6	loamy sand
	MW508582	400	Unpub.	Portugal: Portalegre	39°17'38"N	7°25'52"W	Tuberaria guttata	Acid	5.6	loamy sand
	MW508613	37	Unpub.	Portugal: Portalegre	39°17'38"N	7°25'52"W	Tuberaria guttata	Acid	5.7	loamy sand
	MW508578	63	Unpub.	Portugal: Évora	38°34'00"N	7°54'00"W	Tuberaria guttata	Acid	6.4	sandy loam
	MW508620	164	Unpub.	Portugal: Évora	38°34'00"N	7°54'00"W	Tuberaria guttata	Acid	6.0	sandy loam
	MW508615	167	Unpub.	Portugal: Portalegre	39°17'38"N	7°25'52"W	Tuberaria guttata	Acid	5.4	sandy loam
	MW508591	21	Unpub.	Portugal: Portalegre	39°17'38"N	7°25'52"W	Tuberaria guttata	Acid	5.6	loamy sand
	MW508622	192	Unpub.	Portugal: Évora	38°34'00"N	7°54'00"W	Tuberaria guttata	Acid	6.2	sandy loam
	MW508629	227	Unpub.	Portugal: Évora	38°34'00"N	7°54'00"W	Tuberaria guttata	Acid	5.6	loamy sand
	MW508618	193	Unpub.	Portugal: Évora	38°34'00"N	7°54'00"W	Tuberaria guttata	Acid	6.2	sandy loam
	MW508627	236	Unpub.	Portugal: Évora	38°34'00"N	7°54'00"W	Tuberaria guttata	Acid	5.6	loamy sand
	MW508593	110	Unpub.	Portugal: Castelo Branco	39°57'23''N	7°31'23''W	Tuberaria guttata	Acid	5.1	loamy sand
	MW508587	28	Unpub.	Portugal: Castelo Branco	39°57'23''N	7°31'23''W	Tuberaria guttata	Acid	5.1	loamy sand
	MW508579	68	Unpub.	Portugal: Portalegre	39°17'38"N	7°25'52"W	Tuberaria guttata	Acid	5.6	loamy sand
	MW508631	59	Unpub.	Portugal: Évora	38°34'00"N	7°54'00"W	Tuberaria guttata	Acid	5.4	loamy sand
	MW508635	338	Unpub.	Portugal: Évora	38°34'00"N	7°54'00"W	Tuberaria guttata	Acid	5.4	loamy sand
	MW508634	337	Unpub.	Portugal: Setúbal	38°31'27"N	8°53'17"W	Tuberaria guttata	Acid	6.1	sandy
	MW508639	385	Unpub.	Portugal: Évora	38°34'00"N	7°54'00"W	Tuberaria guttata	Acid	5.6	loamy sand
	MW508633	111	Unpub.	Portugal: Castelo Branco	39°57'23''N	7°31'23''W	Tuberaria guttata	Acid	5.1	loamy sand
	MW508632	62	Unpub.	Portugal: Évora	38°34'00"N	7°54'00"W	Tuberaria guttata	Acid	6.4	sandy loam
	MW508562	4724g	Unpub.	Portugal: Portalegre	39°17'38"N	7°25'52"W	Tuberaria guttata	Acid	5.6	loamy sand
	MW508605	4726a	Unpub.	Portugal: Portalegre	39°17'38"N	7°25'52"W	Tuberaria guttata	Acid	5.6	loamy sand
	MW508594	4726f	Unpub.	Portugal: Portalegre	39°17'38"N	7°25'52"W	Tuberaria guttata	Acid	5.6	loamy sand
	MW508602	4726j	Unpub.	Portugal: Portalegre	39°17'38"N	7°25'52"W	Tuberaria guttata	Acid	5.7	loamy sand
	MW508564	4727b	Unpub.	Portugal: Portalegre	39°17'38"N	7°25'52"W	Tuberaria guttata	Acid	5.6	loamy sand
	MW508574	4726i	Unpub.	Portugal: Portalegre	39°17'38"N	7°25'52"W	Tuberaria guttata	Acid	5.6	loamy sand
	MW508567	4722c	Unpub.	Portugal: Évora	38°34'00"N	7°54'00"W	Tuberaria guttata	Acid	6.2	sandy loam
	MW508583	4670a	Unpub.	Portugal: Setúbal	38°31'27"N	8°53'17"W	Tuberaria guttata	Acid	5.2	loamy sand
	MW508559	4724b	Unpub.	Portugal: Portalegre	39°17'38"N	7°25'52"W	Tuberaria guttata	Acid	5.6	loamy sand
	MW508588	4726g	Unpub.	Portugal: Portalegre	39°17'38"N	7°25'52"W	Tuberaria guttata	Acid	5.6	loamy sand
	MW508560	4724c	Unpub.	Portugal: Portalegre	39°17'38"N	7°25'52"W	Tuberaria guttata	Acid	5.6	loamy sand
	MW508568	4724e	Unpub.	Portugal: Portalegre	39°17'38"N	7°25'52"W	Tuberaria guttata	Acid	5.6	loamy sand
	MW508569	4724f	Unpub.	Portugal: Portalegre	39°17'38"N	7°25'52"W	Tuberaria guttata	Acid	5.6	loamy sand
	MW508608	4726b	Unpub.	Portugal: Portalegre	39°17'38"N	7°25'52"W	Tuberaria guttata	Acid	5.6	loamy sand
	MW508571	4726h	Unpub.	Portugal: Portalegre	39°17'38"N	7°25'52"W	Tuberaria guttata	Acid	5.6	loamy sand
	MW508566	4722b	Unpub.	Portugal: Évora	38°34'00"N	7°54'00"W	Tuberaria guttata	Acid	6.2	sandy loam
	MW508558	4724a	Unpub.	Portugal: Portalegre	39°17'38"N	7°25'52"W	Tuberaria guttata	Acid	5.6	loamy sand
	MW508606	4726d	Unpub.	Portugal: Portalegre	39°17'38"N	7°25'52"W	Tuberaria guttata	Acid	5.6	loamy sand
	MW508584	4726e	Unpub.	Portugal: Portalegre	39°17'38"N	7°25'52"W	Tuberaria guttata	Acid	5.6	loamy sand
	MW508561	4724d	Unpub.	Portugal: Portalegre	39°17'38"N	7°25'52"W	Tuberaria guttata	Acid	5.6	loamy sand
	MW508576	4726c	Unpub.	Portugal: Portalegre	39°17'38"N	7°25'52"W	Tuberaria guttata	Acid	5.6	loamy sand
	MW508638	4725b	Unpub.	Portugal: Setúbal	38°31'27"N	8°53'17"W	Tuberaria guttata	Acid	5.2	loamy sand
	MW508637	4725d	Unpub.	Portugal: Setúbal	38°31'27"N	8°53'17"W	Tuberaria guttata	Acid	5.2	loamy sand
	MW508640	4725g	Unpub.	Portugal: Setúbal	38°31'27"N	8°53'17"W	Tuberaria guttata	Acid	5.2	loamy sand
	MW508636	4725a	Unpub.	Portugal: Setúbal	38°31'27"N	8°53'17"W	Tuberaria guttata	Acid	5.2	loamy sand
	MW508641	4655a	Unpub.	Portugal: Évora	38°34'00"N	7°54'00"W	Tuberaria guttata	Acid	5.4	sandy loam
	KP189328	-	Bordallo et al. 2015	Spain:Burgos	-	-	Helianthemum sp.	Alkaline	-	-
	KP189329	-	Bordallo et al. 2015	Greece:Schinias_Attica	-	-	Pinus spp.	Alkaline	-	-
	KP189330	-	Bordallo et al. 2015	Greece:Schinias_Attica	-	-	Pinus spp.	Alkaline	-	-
	KP189331	-	Bordallo et al. 2015	Greece:Schinias_Attica	-	-	Pinus spp.	Alkaline	-	-
	KP189332	-	Bordallo et al. 2015	Greece:Schinias_Attica	-	-	Pinus spp.	Alkaline	-	-
	KP189333	-	Bordallo et al. 2015	Spain:Burgos	-	-	Helianthemum sp.	Alkaline	-	-
T. grisea	MW508531	331	Unpub.	Portugal: Setúbal	38°31'27"N	8°53'17"W	Tuberaria guttata	Acid	6.0	sandy
	MW508535	332	Unpub.	Portugal: Setúbal	38°31'27"N	8°53'17"W	Tuberaria guttata	Acid	6.0	sandy
	MW508536	333	Unpub.	Portugal: Setúbal	38°31'27"N	8°53'17"W	Tuberaria guttata	Acid	6.1	sandy
	MW508533	334	Unpub.	Portugal: Setúbal	38°31'27"N	8°53'17"W	Tuberaria guttata	Acid	6.0	sandy
	MW508532	4670b	Unpub.	Portugal: Setúbal	38°31'27"N	8°53'17"W	Tuberaria guttata	Acid	6.1	sandy
	MW508537	4725e	Unpub.	Portugal: Setúbal	38°31'27"N	8°53'17"W	Tuberaria guttata	Acid	6.0	sandy
	MW508538	4725f	Unpub.	Portugal: Setúbal	38°31'27"N	8°53'17"W	Tuberaria guttata	Acid	6.0	sandy
	MW508539	4725h	Unpub.	Portugal: Setúbal	38°31'27"N	8°53'17"W	Tuberaria guttata	Acid	6.0	sandy
	MW508534	4727a	Unpub.	Portugal: Portalegre	39°17'38"N	7°25'52"W	Tuberaria guttata	Acid	5.7	loamy sand
	MG818752	-	Bordallo et al. 2018	Portugal: Évora	38°34'00"N	7°54'00"W	Tuberaria guttata	Acid	5.5	loamy sand
	MG818753	-	Bordallo et al. 2018	Spain:Caceres			Tuberaria guttata	Acid	-	-
	MN338748	-	Louro et al. 2020	Portugal: Setúbal	38°31'27"N	8°53'17"W	Tuberaria guttata	Acid	6.1	sandy
	MG818754	-	Louro et al. 2020	Portugal: Évora	38°34'00"N	7°54'00"W	Tuberaria guttata	Acid	5.5	loamy sand
T. lusitanica	MN338747	-	Louro et al. 2020	Portugal: Setúbal	38°31'27"N	8°53'17"W	Tuberaria guttata	Acid	6.1	sandy
	MN338745	-	Louro et al. 2020	Portugal: Évora	38°34'00"N	7°54'00"W	Tuberaria guttata	Acid	5.5	loamy sand
	MN338744	-	Louro et al. 2020	Portugal: Évora	38°34'00"N	7°54'00"W	Tuberaria guttata	Acid	5.7	loamy sand
	MN338746	-	Louro et al. 2020	Portugal: Setúbal	38°31'27"N	8°53'17"W	Tuberaria guttata	Acid	6.1	sandy
	MW508554	380	Unpub.	Portugal: Évora	38°34'00"N	7°54'00"W	Tuberaria guttata	Acid	6.2	sandy
	MW508553	123	Unpub.	Portugal: Évora	38°34'00"N	7°54'00"W	Tuberaria guttata	Acid	5.5	loamy sand
	MW508555	174	Unpub.	Portugal: Évora	38°34'00"N	7°54'00"W	Tuberaria guttata	Acid	5.3	sandy
T. olbiensis	AF387657	-	Kovacs et al. 2011	Spain	-	-	-	-	-	-
	HQ698102	-	Kovacs et al. 2011	Spain:Madrid	-	-	-	-	-	-
	MG640478	-	Crous et al. 2018	Spain: Albacete	-	-	-	-	-	-
	MG640482	-	Crous et al. 2018	Spain: La Rioja	-	-	-	-	-	-
T. pseudoleptoderma	HM056211	-	Bordallo et al. 2013	Spain:Burgos	-	-	Cistaceae	-	-	-
	HM056213	-	Bordallo et al. 2013	Spain:Caceres	-	-	Cistaceae	-	-	-
T. pini	HM056210	-	Bordallo et al. 2013	Spain:Burgos	-	-	Pinus sp.	-	-	-
	HQ698101	-	Kovacs et al. 2011	Spain:Burgos	-	-	-	-	-	-
	HQ698117	-	Kovacs et al. 2011	Portugal:Minho	-	-	Pinus pinaster	-	-	-
	HQ698123	-	Kovacs et al. 2011	Spain:Valladolid	-	-	Quercus sp.	-	-	-
	HQ698129	-	Kovacs et al. 2011	Spain:Segovia	-	-	Pinus pinaster	-	-	-
	HQ698138	-	Kovacs et al. 2011	Spain:Palencia	-	-	Quercus spp.	-	-	-
	MW508540	13	Unpub.	Portugal: Évora	38°34'00"N	7°54'00"W	Pinus pinea	Acid	5.5	sandy loam
	MW508550	275	Unpub.	Portugal: Portalegre	39°17'38"N	7°25'52"W	Quercus pyrenaica	Acid	5.4	sandy loam
	MW508549	276	Unpub.	Portugal: Portalegre	39°17'38"N	7°25'52"W	Quercus pyrenaica	Acid	5.4	sandy loam
	MW508547	278	Unpub.	Portugal: Portalegre	39°17'38"N	7°25'52"W	Quercus pyrenaica	Acid	5.4	sandy loam
	MW508548	290	Unpub.	Portugal: Évora	38°34'00"N	7°54'00"W	Quercus rotundifolia	Acid	5.4	sandy loam		References
	MW508551	310	Unpub.	Portugal: Évora	38°34'00"N	7°54'00"W	Quercus rotundifolia	Acid	6.0	sandy loam
	MW508552	311	Unpub.	Portugal: Évora	38°34'00"N	7°54'00"W	Quercus rotundifolia	Acid	6.0	sandy loam		Bordallo JJ, Rodriguez A, Honrubia M, Morte A (2012) Terfezia canariensis sp. nov. una nueva especie de trufa encontrada en las Islas Canarias. Journal Cantarela 56: 1-8.
	MW508544	313	Unpub.	Portugal: Évora	38°34'00"N	7°54'00"W	Quercus rotundifolia	Acid	5.3	sandy loam
	MW508546	314	Unpub.	Portugal: Évora	38°34'00"N	7°54'00"W	Quercus rotundifolia	Acid	5.3	sandy loam		Bordallo JJ, Rodriguez A, Muñoz-Mohedano JM, Suz LM, Honrubia M, Morte A (2013) Morphological and molecular characterization of five new Terfezia species from the Iberian Peninsula. Mycotaxon 124: 189-208.
	MW508541	315	Unpub.	Portugal: Évora	38°34'00"N	7°54'00"W	Quercus rotundifolia	Acid	5.3	sandy loam
	MW508545	316	Unpub.	Portugal: Évora	38°34'00"N	7°54'00"W	Quercus rotundifolia	Acid	5.3	sandy loam		Bordallo JJ, Rodríguez A, Kounas V, Camello F, Honrubia M, Morte A (2015) Two new Terfezia species from Southern Europe. Phytotaxa 230(3): 239-249.
	MW508543	317	Unpub.	Portugal: Évora	38°34'00"N	7°54'00"W	Quercus rotundifolia	Acid	5.3	sandy loam
	MW508542	370	Unpub.	Portugal: Évora	38°34'00"N	7°54'00"W	Quercus rotundifolia	Acid	6.0	sandy loam		Bordallo JJ, Rodríguez A, Santos-Silva C, Louro R, Muñoz-Mohedano J, Morte A (2018) Terfezia lusitanica, a new mycorrhizal species associated to Tuberaria guttata (Cistaceae). Phytotaxa 357(2): 141-147.
	MN338727	-	Louro et al. 2020	Portugal: Évora	38°34'00"N	7°54'00"W	Tuberaria guttata	Acid	6.0	sandy loam
	MN338731	-	Louro et al. 2020	Portugal: Évora	38°34'00"N	7°54'00"W	Tuberaria guttata	Acid	6.0	sandy loam		Crous PW et al. (2018) Fungal Planet description sheets: 716-784. Persoonia 40: 240-393.
	MN338729	-	Louro et al. 2020	Portugal: Évora	38°34'00"N	7°54'00"W	Tuberaria guttata	Acid	6.0	sandy loam
	MN338728	-	Louro et al. 2020	Portugal: Évora	38°34'00"N	7°54'00"W	Tuberaria guttata	Acid	6.0	sandy loam		Crous PW, Wingfield MJ, et al. (2019) Fungal Planet description sheets: 951-1041. Persoonia 43: 223-425.
	MN338733	-	Louro et al. 2020	Portugal: Évora	38°34'00"N	7°54'00"W	Tuberaria guttata	Acid	6.0	sandy loam
	MN338732	-	Louro et al. 2020	Portugal: Évora	38°34'00"N	7°54'00"W	Tuberaria guttata	Acid	6.0	sandy loam		Dafri A, Beddiar A (2017) Desert truffles from northeastern Algerian coastal dunes: Ecology, identification and symbiosis. Journal of Fundamental and Applied Sciences 9(1): 153-169
	HQ698149	-	Kovacs et al. 2011	Spain: Caceres	-	-	Cistaceae	-	-	-
T. solaris-libera	HM056215	-	Bordallo et al. 2013	Spain:Badajoz	-	-	Cistaceae	-	-	-		Diez J, Manjon JL, Martin F (2002) Molecular phylogeny of the mycorrhizal desert truffles (Terfezia and Tirmania), host specificity and edaphic tolerance. Mycologia 94: 247-259.
	MW508651	3853e	Unpub.	Portugal: Évora	38°34'00"N	7°54'00"W	Tuberaria guttata	Acid	6.0	sandy loam
	MW508648	3853b	Unpub.	Portugal: Évora	38°34'00"N	7°54'00"W	Tuberaria guttata	Acid	6.0	sandy loam		Ferdman Y, Aviram S, Roth-Bejerano N, Trappe JM, Kagan-Zur V (2005) Phylogenetic studies of Terfezia pfeilii and Choiromyces echinulatus (Pezizales) support new genera for southern African truffles: Kalaharituber and Eremiomyces. Mycological Research 109(2): 237-245.
	MW508645	3853f	Unpub.	Portugal: Évora	38°34'00"N	7°54'00"W	Tuberaria guttata	Acid	6.0	sandy loam
	MW508647	3853c	Unpub.	Portugal: Évora	38°34'00"N	7°54'00"W	Tuberaria guttata	Acid	6.0	sandy loam		Jamali S, Banihashemi Z (2012) Hosts and distribution of Desert Truffles in Iran, based on morphological and molecular criteria. Journal of Agricultural Science and Technology 14: 1379-1396.
	MW508646	3853g	Unpub.	Portugal: Évora	38°34'00"N	7°54'00"W	Tuberaria guttata	Acid	6.0	sandy loam
	MW508650	3853d	Unpub.	Portugal: Évora	38°34'00"N	7°54'00"W	Tuberaria guttata	Acid	6.0	sandy loam		Kovacs GM, Balazs TK, Calonge FD, Martín MP (2011) The diversity of Terfezia desert truffles: new species and a highly variable species complex with intra-sporocarpic nrDNA ITS heterogeneity. Mycologia 103(4): 841-853.
	MW508643	4150a	Unpub.	Portugal: Évora	38°34'00"N	7°54'00"W	Tuberaria guttata	Acid	6.0	sandy loam
	MW508644	4150b	Unpub.	Portugal: Évora	38°34'00"N	7°54'00"W	Tuberaria guttata	Acid	6.0	sandy loam		Louro R, Nobre T, Santos-Silva C (2020) Terfezia solaris-libera sp. nov., A new mycorrhizal species within the spiny-spored lineages. Journal of Mycology & Mycological Sciences 3(2): 1-13.
	MW508642	4150c	Unpub.	Portugal: Évora	38°34'00"N	7°54'00"W	Tuberaria guttata	Acid	6.0	sandy loam
	MW508649	371	Unpub.	Portugal: Évora	38°34'00"N	7°54'00"W	Tuberaria guttata	Acid	6.0	sandy loam		Sbissi I, Ghodhbane-Gtari F, Neffati M, Ouzari H, Boudabous A, Gtari M (2011) Diversity of the desert truffle Terfezia boudieri Chatin. in southern Tunisia. Canadian Journal of Microbiology 57: 599-605.
